# Supplementary material
Source: publisher site journal article supplement (https://www.spandidos-publications.com/6686/downloadSupplementary)
Supplement: Supplementary file 1 [file downloadSupplementary]

## Sheet: Table S1
Table SI. Genes associated with lung cancer identified by weighted gene co-expression network analysis.
Genes
ALKBH3
MED19
PTPRN
ERAL1
PPME1
NSDHL
FAM189B
COA4
EBNA1BP2
COA3
VPS25
POMT2
RAC3
MIR210HG
DPY30
STOML2
DDX10
ACTR3B
COQ9
ZCCHC17
GPRC5D-AS1
MTA3
MRPS17
